1                   **Functional cortical localization of the tongue using corticokinematic**  
2                   **coherence with a deep learning-assisted motion capture system**  
3

4   Running title: Tongue CKC by motion capture  
5

6   Hitoshi Maezawa<sup>a,\*</sup>, Momoka Fujimoto<sup>b</sup>, Yutaka Hata<sup>b</sup>, Masao Matsushashi<sup>c</sup>, Hiroaki  
7   Hashimoto<sup>a,d</sup>, Hideki Kashioka<sup>e</sup>, Toshio Yanagida<sup>e</sup>, Masayuki Hirata<sup>a</sup>  
8

9   <sup>a</sup>*Department of Neurological Diagnosis and Restoration, Graduate School of Medicine,*  
10 *Osaka University, Yamadaoka 2-2, Suita, Osaka 565-0871, Japan*

11 <sup>b</sup>*Graduate School of Simulation Studies, University of Hyogo,*  
12 *Minatojima-minamimachi 7-1-28, Chuo-ku, Kobe, Hyogo 650-0047, Japan*

13 <sup>c</sup>*Human Brain Research Center, Graduate School of Medicine, Kyoto University,*  
14 *Kawahara-cho 53, Sakyo-ku, Kyoto 606-8507, Japan*

15 <sup>d</sup>*Neurosurgery, Otemae Hospital, Otemae1-5-34, Chuo-ku, Osaka 540-0008, Japan*

16 <sup>e</sup>*Center for Information and Neural Networks (CiNet), National Institute of Information*  
17 *and Communications Technology, and Osaka University, Yamadaoka 1-4, Suita, Osaka*  
18 *565-0871, Japan*  
19

20 **\*Corresponding author:** Hitoshi Maezawa, DDS, PhD

21 Department of Neurological Diagnosis and Restoration, Graduate School of Medicine,  
22 Osaka University, Yamadaoka 2-2, Suita, Osaka 565-0871, Japan

23 TEL: 81-06-6210-8429; FAX: 81-06-6210-8430

24 E-mail: maezawa@ndr.med.osaka-u.ac.jp  
25  
26  
27  
28

**Abbreviations:** ACC, Accelerometer; CKC, Corticokinematic coherence; ECD, Equivalent current dipole; EMG, Electromyography; LED, light-emitting diode; MEG, Magnetoencephalography; MEF, Movement evoked field; MRI, Magnetic resonance image; SM1, primary sensorimotor cortex; SEM, Standard error of the mean.

29 **Acknowledgments**

30 We thank Dr. Takafumi Suzuki, Dr. Takeshi Nogai and Dr. Asuka Otsuka (Center for  
31 Information and Neural Networks (CiNet), National Institute of Information and  
32 Communications Technology, and Osaka University) for supporting our MEG  
33 recording.

34

35 **Funding**

36 This work was supported by the Grants-in-Aid for Scientific Research from the Japan  
37 Society for the Promotion of Science [grant numbers (A)18H04166 (MH),  
38 (C)19K10218 (HM)].

39

40 **Conflict of interest disclosure**

41 The authors declare no competing financial interest.

42

43 **Data and Code Availability**

44 The movements of the tongue and fingers were analyzed with deep learning-assisted  
45 motion capture using the open-source toolbox DeepLabCut  
46 (<https://github.com/AlexEMG/DeepLabCut>). We also used custom-made MATLAB®  
47 (MathWorks, Natick, MA, United States) scripts, created by Prof. Masao Matsushashi  
48 (Kyoto university), for MEG data preprocessing. The custom MATLAB toolbox is  
49 available from the corresponding authors upon reasonable request, subject to a formal  
50 code sharing agreement with Prof. Masao Matsushashi. Data presented in this study will  
51 be made available upon reasonable request and with permission of the study participants  
52 and a formal data sharing agreement.

53

54 **Ethics approval statement**

55 The study was approved by the local ethics and safety committees at Osaka University  
56 Hospital (No. 16469-2) and the Center for Information and Neural Networks (CiNet) at  
57 the National Institute of Information and Communications Technology (No.  
58 1910280040). All the participants provided written informed consent in accordance  
59 with the ethical standards stated in the Declaration of Helsinki.

60

61

62 **Abstract**

63 Measuring the corticokinematic coherence (CKC) between magnetoencephalographic  
64 and movement signals using an accelerometer can evaluate the functional localization of  
65 the primary sensorimotor cortex (SM1) of the upper limbs. However, it is difficult to  
66 determine the tongue CKC because an accelerometer yields excessive magnetic artifacts.  
67 We introduce and validate a novel approach for measuring the tongue CKC using a deep  
68 learning-assisted motion capture system with videography, and compare it with an  
69 accelerometer in a control task measuring finger movement. Twelve healthy volunteers  
70 performed rhythmical side-to-side tongue movements in the whole-head  
71 magnetoencephalographic system, which were simultaneously recorded using a video  
72 camera and examined offline using a deep learning-assisted motion capture system. In  
73 the control task, right finger CKC measurements were simultaneously evaluated via  
74 motion capture and an accelerometer. The right finger CKC with motion capture was  
75 significant at the movement frequency peaks or its harmonics over the contralateral  
76 hemisphere; the motion-captured CKC was 84.9% similar to that with the accelerometer.  
77 The tongue CKC was significant at the movement frequency peaks or its harmonics  
78 over both hemispheres, with no difference between the left and right hemispheres. The  
79 CKC sources of the tongue were considerably lateral and inferior to those of the finger.  
80 Thus, the CKC based on deep learning-assisted motion capture can evaluate the  
81 functional localization of the tongue SM1. In this approach, because no devices are  
82 placed on the tongue, magnetic noise, disturbances due to tongue movements, risk of  
83 aspiration of the device, and risk of infection to the experimenter are eliminated.

84

85 Keywords: Magnetoencephalography, Motion tracking, Motor-evoked field, Lingual,

86 Oral function, Primary sensorimotor cortex.

87

88 **1. Introduction**

89 The tongue plays an important role in various critical human functions, including  
90 swallowing, mastication, and speech, and can perform sophisticated movements. The  
91 area of the primary sensorimotor cortex (SM1) representing the tongue occupies a wide  
92 distribution relative to its actual size in the body (Penfield and Boldrey, 1937),  
93 suggesting the functional importance of the SM1 of the tongue region. However, as it is  
94 difficult to measure electromagnetic cortical signals during tongue movements without  
95 artifact contamination because of the short distance between the tongue and brain, the  
96 cortical representation of the tongue regions has rarely been examined. Thus, it is  
97 important to establish robust methods for evaluating the functional localization of the  
98 tongue region to reveal the central mechanisms of fine tongue movements. Moreover, as  
99 the tongue is innervated by both hypoglossal nerves from the bilateral SM1 (Penfield  
100 and Boldrey, 1937). Therefore, neurosurgical operation of the target side of the tongue  
101 SM1 does not generally deteriorate the tongue motor functions compared with hand  
102 motor dysfunctions that frequently occur when operating on the hand SM1. However, it  
103 is essential to evaluate the presurgical localization of the SM1 of the tongue region to  
104 minimize the deterioration of tongue motor functions after surgery, which would  
105 significantly reduce the post-surgery quality of life, since dysfunctions in critical tongue  
106 motor functions can potentially cause dysphagia and silent aspiration (Meadows, 1973;  
107 Horner and Massey, 1988; Robbins et al., 1993). Thus, during neurosurgery, it is critical  
108 to evaluate the somatotopic source localization of the tongue region before the surgery.

109 Corticokinematic coherence (CKC) is a useful approach for identifying the SM1 of  
110 fingers in healthy adults (Bourguignon et al., 2011, 2019), newborns (Smeds et al.,  
111 2017), and patients with impaired spinocortical proprioceptive pathways in Friedreich

Maezawa et al.

112 ataxia (Marty et al., 2019). Conventional CKC methods quantify the coupling between  
113 magnetoencephalographic (MEG) signals and finger kinematics, which are measured  
114 using an accelerometer (ACC) during repetitive, rhythmic, and voluntary finger  
115 movements (Bourguignon et al., 2011; 2013). Previous studies have shown that the  
116 CKC mainly reflects the proprioceptive input into the SM1 (Piitulainen et al., 2013a;  
117 Bourguignon et al., 2015; 2017); this feature is comparable to the strongest deflections  
118 observed in the cortical movement evoked fields (MEFs) associated with voluntary  
119 finger movements (Cheyne et al., 1989; 1997; Gerloff et al., 1998). However, it is  
120 difficult to apply this technique to regions of the tongue using an ACC because the ACC  
121 produces excessive magnetic artifacts, which easily contaminate the cortical magnetic  
122 activity due to the short distance between the tongue and MEG sensors. It is also  
123 technically challenging to set an ACC on narrow and wet tongue regions. Moreover,  
124 ACCs with cables have the disadvantage of sometimes disturbing the smooth  
125 movements of the tongue.

126 Motion capture through videography is a useful approach for evaluating the motor  
127 behaviors of humans and other species. Traditionally, motion capture has been  
128 performed by placing tracking markers on the target regions of the subject (Bernstein,  
129 1967; Winter, 2009; Vargas-Irwin et al., 2010; Wenger et al., 2014; Maghsoudi et al.,  
130 2017). However, applying this approach to tongues present technical problems because  
131 tracking markers set on wet tongue regions can easily be displaced during tasks  
132 involving tongue movements. Moreover, using tracking markers pose risks in patients  
133 with tongue sensorimotor impairment as they may accidentally swallow the tracking  
134 markers. Regarding its clinical application, while setting objects on the tongue, it is

135 important to reduce the risk of infections such as COVID-19 to the experimenter via the  
136 saliva.

137 Recently, Mathis et al. (2018) reported significant progress with the use of  
138 “DeepLabCut.” They implemented a systematic method to estimate the tracks of  
139 markerless movements. They successfully demonstrated that a small number of training  
140 images (~200) was sufficient to train this network with human-level labeling accuracy.  
141 This is possible because of transfer learning; the feature detectors are based on  
142 extremely deep neural networks, which were pretrained on ImageNet (He et al., 2016).  
143 Thus, this method involves the use of transfer learning techniques with deep neural  
144 networks, and yields outstanding results with minimal training data. This deep  
145 learning-assisted motion tracking system with DeepLabCut is useful for the application  
146 of tongue CKC because it does not use any recording device or tracking marker on the  
147 tongue, thereby eliminating the previously mentioned disadvantages of magnetic device  
148 noise, marker displacement, and additional risks of accidental aspiration and infection.

149 Herein, we introduce a novel approach that utilizes the CKC between the MEG and  
150 movement signals of the tongue during rhythmic tongue movements based on a deep  
151 learning-assisted motion capture system. Our main hypothesis is that the source  
152 locations for the tongue CKC differs from those of the finger CKC using the deep  
153 learning-assisted motion tracking system. In addition, to confirm the hypothesis that the  
154 CKC using the deep learning-assisted motion tracking system is reliable, we validate  
155 this CKC approach by comparing the CKC of fingers using motion capture with the  
156 CKC using ACC.

157

## 158 **2. Materials and Methods**



159 **2.1 Subjects**

160 Twelve healthy volunteers (10 men, 2 women; aged 21–35 y; mean age = 25.0 y)  
161 were examined. The participants were right-handed, as determined by the Edinburgh  
162 Handedness Inventory (Oldfield, 1971). None of the subjects had a history of  
163 neurological or psychiatric disorders. All the participants provided written informed  
164 consent in accordance with the ethical standards stated in the Declaration of Helsinki,  
165 and the study was approved by the local ethics and safety committees at Osaka  
166 University Hospital (No. 16469-2) and the Center for Information and Neural Networks  
167 (CiNet) at the National Institute of Information and Communications Technology (No.  
168 1910280040).

169

170 **2.2 Movement Tasks of Tongue and Fingers**

171 The subjects were asked to perform constant, rhythmic side-to-side tongue  
172 movements with a slightly opened mouth for at least 3 min in two or three sessions  
173 (60–90 s each), separated by 30-s rest periods. They were asked to avoid drastic tongue  
174 movements to reduce the effects of touch sensations from the orofacial regions during  
175 tongue movement. They were also requested to relax the other orofacial parts during  
176 these tasks.

177 In the control task, the subjects were asked to make constant, rhythmic up-and-down  
178 movements of the right index finger over a table for at least 3 min in two sessions (90 s  
179 each), separated by a resting period of 30 s. During the resting periods, subjects were  
180 permitted to relax their orofacial muscles and swallow the saliva.

181 We attempted to observe the rhythmic movements of the right index finger in all  
182 twelve subjects (right finger condition). Four subjects (Subject 2, 3, 6, 12) performed

183   rhythmical movements for both conditions (right and bilateral finger conditions) in a  
184   randomized order. The subjects were asked not to touch the table or other fingers during  
185   the finger movement tasks.

186       During the tongue and finger movement tasks, the participants were directed to  
187   fixate their gaze at a point on the wall in a magnetically shielded room to avoid any  
188   effects of eye movement or visual perception.

189

## 190   **2.3 Recordings**

### 191   **2.3.1 MEG and ACC recording**

192       Cortical activity was recorded by CiNet using a whole-head MEG system with 360  
193   channels (204 planar gradiometers, 102 magnetometers, and 54 axial gradiometers)  
194   (Neuromag® 360, Elekta, Helsinki, Finland). Planar gradiometers with 204 channels  
195   were used for the analysis. The position of the subject's head inside the MEG helmet  
196   was continuously monitored by supplying a current to four coils fixed to the scalp for  
197   tracking head movements. An electromagnetic tracker was used to fix the coils  
198   according to the anatomical fiducials (Fastrak, Polhemus, Colchester, VT). The  
199   participants were seated in an upright position in the magnetically shielded room. To  
200   monitor the movements of the right index finger, a three-axis ACC (KXM52-1050,  
201   Kionix, Ithaca, NY, USA) was attached to the nail of the right index finger. The ACC  
202   cables were fixed to the hand and table using tape to prevent the generation of noise.  
203   The MEG and ACC signals were recorded with a passband at 0.03–330 Hz, and the  
204   signals were sampled at 1 kHz.

205

### 206   **2.3.2 Video and MRI recording**

207 The movements of each target region (the tongue and index fingers) were  
208 video-recorded simultaneously throughout the MEG recording at 120 fps with a  
209 resolution of  $1280 \times 720$  pixels, using a camera (DMC-FZ200, Panasonic, Osaka,  
210 Japan). To obtain a frontal view of each target region, the camera was positioned in  
211 front of the MEG gantry at a distance of 1.5 m. To record the finger and tongue  
212 movements, the zoom function of the camera was used to record the images of both  
213 hands—including the index fingers—and the lower part of the orofacial region (from  
214 neck to nasion). To match the onset time between the MEG and movement signals with  
215 motion capture analysis, the MEG system included a light-emitting diode (LED) that  
216 was strobed five times at 1 Hz before and after each movement task and was captured in  
217 the video images. To determine the brain anatomy of each subject, three-dimensional T1  
218 magnetic resonance images (MRIs) were acquired using a 3T MRI scanner (Siemens  
219 MAGNETOM Trio or Vida, Siemens, Munich, Germany).

220

## 221 **2.4 Data Analysis**

### 222 **2.4.1 Movement signals with the motion capture system**

223 The movements of the tongue and fingers were analyzed offline via deep  
224 learning-assisted motion capture with videography using the open-source toolbox,  
225 DeepLabCut (Mathis et al., 2018) (<https://github.com/AlexEMG/DeepLabCut>). The  
226 image resolution was changed to  $960 \times 540$  pixels. For motion tracking, we extracted  
227 100–150 random, distinct frames from the videos for each movement task. We cropped  
228 the frames such that the target regions were clearly visible and manually labeled the tip  
229 of the tongue/finger in each extracted frame. The system was then trained using a deep  
230 neural network architecture to predict the target regions based on the corresponding

231 images. Different networks were trained for each target region in 100,000–200,000  
232 iterations as the loss relatively flattened (Mathis et al., 2018; Nath et al., 2019). The  
233 trained networks could track the locations of the target regions in the full sets of video  
234 segments (Supplementary Videos 1 and 2). The labeled  $x$ -axis (i.e. left-right) and  $y$ -axis  
235 (i.e. bottom-top) positions of the pixels in each frame were stored and exported in CSV  
236 format for subsequent analysis using MATLAB (The MathWorks, Natick,  
237 Massachusetts, USA). The Euclidian norm of the two orthogonal ( $x$ - and  $y$ -axes) signals  
238 with baseline correction was used as the movement signal for motion capture.

239

#### 240 **2.4.2 Coherence between MEG and movement signals**

241 The raw MEG signals were spatially filtered offline with the temporal extension of  
242 the signal space separation method (Taulu and Simola, 2006; Taulu and Hari, 2009)  
243 using MaxFilter (version 2.2.12, Elekta Neuromag, Finland). The MEG and ACC  
244 signals were adjusted by down-sampling to 500 Hz. The movement signals were  
245 adjusted by up-sampling with the motion capture system to match the MEG signals at  
246 500 Hz. LED flashes were applied to the images for correction between the MEG and  
247 movement signals with motion capture.

248 The coherence spectra between the MEG and rectified movement signals with  
249 motion capture were calculated using the method proposed by Welch (1967) for the  
250 estimation of spectral density, where half-overlapping samples, a frequency resolution  
251 of 0.5 Hz, and a Hanning window were used. The following equation was used to  
252 determine the coherence (Coh<sub>xy</sub>).

$$\text{Coh}_{xy}(\lambda) = |\text{R}_{xy}(\lambda)|^2 = \frac{|f_{xy}(\lambda)|^2}{f_{xx}(\lambda) \cdot f_{yy}(\lambda)}$$

253 where  $f_{xx}(\lambda)$  and  $f_{yy}(\lambda)$  respectively denote the values of the auto-spectra of the MEG  
254 signals and rectified movement signals with motion capture for a given frequency,  $\lambda$ ,  
255 and  $f_{xy}(\lambda)$  represents the cross-spectrum between  $f_{xx}(\lambda)$  and  $f_{yy}(\lambda)$ . We used the position  
256 data as movement signals for the CKC analysis with capture motion since the mean  
257 CKC value is within 5% error among approaches using position, velocity, and  
258 acceleration (Supplementary Table). The coherence spectra between the MEG and  
259 Euclidian norm of the three orthogonal ACC signals ( $x$ -axis (i.e. left-right),  $y$ -axis (i.e.  
260 bottom-top),  $z$ -axis (i.e. near-far)) from right index finger were also calculated.

261 We checked the epochs comprising artifacts related to unintended orofacial muscle  
262 movements such as coughing, which were distinguished through visual inspection.  
263  $96.83 \pm 1.79$  (mean  $\pm$  standard error of the mean (SEM)) (ranging from 88 to 107 ( $n =$   
264 12)) samples were obtained for the tongue CKC. The epochs for the finger CKC  
265 included  $96.42 \pm 1.52$  (ranging from 87 to 106 ( $n = 12$ )) samples for the right finger  
266 condition and  $105.00 \pm 3.24$  (ranging from 98 to 111 ( $n = 4$ )) samples for the bilateral  
267 finger condition. According to the method proposed by Rosenberg et al. (1989), all  
268 coherence values above  $Z$  were considered to be significant at  $p < 0.01$ , where  $Z =$   
269  $1 - 0.01^{(1/L-1)}$  and  $L$  denotes the total number of samples for the auto- and cross-spectrum  
270 analyses.

271 The cross-correlogram in the time domain was calculated by applying an inverse  
272 Fourier transformation to the averaged cross-spectra for the tongue CKC and right  
273 finger CKC with motion capture. The cross-correlogram underwent bandpass filtering at  
274 1–45 Hz. Isocontour maps were constructed at the time points at which the peaks of the  
275 cross-correlogram were observed. The sources of the oscillatory MEG signals were  
276 modeled as equivalent current dipoles (ECDs). To estimate the ECD locations, the

277 spherical head model was adopted; the center of this model was consistent with the  
278 local curvature of the brain surface of an individual, as determined by the MRI (Sarvas,  
279 1987). Only the ECDs with a goodness-of-fit value of at least 85% were accepted. One  
280 subject (Subject 11) was excluded from the ECD analysis of the tongue CKC due to an  
281 insufficient goodness-of-fit criterion.

282

### 283 **2.5 Statistical analysis**

284 The data are expressed as the mean  $\pm$  SEM. An arc hyperbolic tangent  
285 transformation was used to normalize the values of the coherence to ensure that the  
286 variance was stabilized (Halliday et al., 1995). The values of the CKC of the tongue  
287 were analyzed between the left and right hemispheres using paired *t*-tests. The statistical  
288 significance level was set to  $p < 0.05$ . The ECD locations over the left hemisphere along  
289 each axis (*x*-, *y*-, and *z*-axes) were analyzed between the tongue CKC and right finger  
290 CKC using paired *t*-tests with Bonferroni correction. The corrected *p* value with  
291 Bonferroni correction was set to  $p < 0.0167$  ( $0.05/3$ ). The *x*-axis intersected the  
292 preauricular points from left to right; the *y*-axis intersected the nasion; the *z*-axis was  
293 perpendicular to the plane determined by the *x*- and *y*-axes.

294

### 295 **3. Results**

296 Figures 1A and B depict representative raw data and power spectra of the movement  
297 signals with motion capture and the ACC, respectively, for the right finger condition of  
298 Subject 2. Cyclic rhythms were observed at a specific frequency band of the finger  
299 movements for both motion capture and the ACC (Fig. 1A). The peak of the power  
300 spectra of movement signals with both motion capture and the ACC exhibited the same

301 frequency band of movement rhythms, at 3.3 Hz (indicated by arrows) (Fig. 1B). The  
302 peak CKC of the right finger was observed over the contralateral hemisphere at 7.0 Hz  
303 with both motion capture (CKC value = 0.61) and the ACC (CKC value = 0.60), around  
304 the harmonic frequency band of finger movements (Fig. 1C). The peak CKC of the  
305 tongue was observed over the left hemisphere (CKC value: 0.43) and right hemisphere  
306 (CKC value: 0.46) at 3.3 Hz, around the harmonic frequency band of tongue movements  
307 (Fig. 2A[1,2]).

308 For the right finger condition, the peak frequencies of the power spectrum of the  
309 movement signals were the same, at 1.8–3.8 Hz for both motion capture and the ACC  
310 (Table 1). The coherence spectra exhibited significant peaks ( $p < 0.01$ ) over the  
311 contralateral hemisphere at 2.0–7.0 Hz and 2.0–7.0 Hz with motion capture and the  
312 ACC, respectively, corresponding to the frequencies of finger movements or their  
313 harmonics in all 12 subjects (Table 1). The CKC value with motion capture (mean,  
314 0.433) was compared with that of CKC with the ACC (mean, 0.510), achieving a  
315 similarity of 84.9% (Table 1). For the bilateral finger condition, the CKC also exhibited  
316 peaks for each side of the finger in all 4 subjects (Table 2).

317 For the tongue movements, the peak frequencies of the power spectrum of the  
318 movement signals were detected at 1.3–3.3 Hz (Table 3). The CKC spectra for the  
319 tongue showed significant peaks ( $p < 0.01$ ) at 2.5–5.3 Hz over the left hemisphere and  
320 at 2.5–6.0 Hz over the right hemisphere in all subjects, corresponding to the frequency  
321 of tongue movements or their harmonics (Table 3). The CKC values were not  
322 significantly different between the left (mean, 0.203) and right (mean, 0.188)  
323 hemispheres ( $p = 0.499$ ) (Table 3).

324 The spatial distributions of the cross-correlogram of the finger and tongue CKC  
325 showed peaks over the contralateral and bilateral hemispheres (Fig. 2A[3–5]),  
326 respectively. Dipolar field patterns, which were centered on the Rolandic sensors, were  
327 observed at the principal peaks of the cross-correlogram (Fig. 2B[1]). The sources for  
328 the tongue CKC were estimated to be over the left and right SM1 in 11 subjects,  
329 respectively (Fig. 2B[2]). The sources for the right finger CKC were located in the SM1  
330 over the contralateral hemisphere in all of the 12 subjects (Fig. 2C[2]). The results of  
331 the paired *t*-test implied that the locations of the ECDs of the tongue were considerably  
332 lateral (mean = 13.99 mm;  $p < 0.001$ ; paired *t*-test with Bonferroni correction) and  
333 inferior (mean = 20.78 mm;  $p < 0.001$ ), but not anterior (mean = 5.15 mm;  $p = 0.029$ ) to  
334 those of the finger (Fig. 3).

335

#### 336 **4. Discussion**

337 Significant coherence between MEG and tongue movement signals was detected  
338 over the bilateral hemispheres using deep learning-assisted motion capture with  
339 videography. The sources of the coherence activity were detected in the bilateral SM1 of  
340 the tongue region, which were found to be considerably lateral and inferior to the finger  
341 SM1, corresponding to the classical homunculus. These results suggest that the use of  
342 deep learning-assisted motion capture in CKC is a robust and useful approach for  
343 evaluating the functional localization of the tongue SM1.

344 The reliability of measuring CKC using motion capture is comparable to that of the  
345 conventional ACC-based CKC method (Bourguignon et al., 2011; 2012), as evidenced  
346 by the fact that the finger CKC value obtained using motion capture achieved a  
347 similarity of 84.9% when compared with the CKC value obtained using the ACC and



348 the finger CKC value obtained using ACC. In addition, as the power spectrum of  
349 movement signals and CKC showed the same peak frequency bands between the  
350 motion capture and ACC for all subjects during the finger movement tasks, determining  
351 the CKC with deep learning-assisted motion capture was found to be reliable.

352 Previous studies involving non-human primates have revealed that several  
353 movement parameters, such as position, rotation, direction, and movement velocity, are  
354 encoded in the SM1, as determined using the recordings of a single neuron, local field  
355 potential, and multi-unit activity (Ashe and Georgopoulos, 1994; Caminiti et al., 1990;  
356 Carmena et al., 2003; Mehring et al., 2003; Moran and Schwartz, 1999; Reina et al.,  
357 2001). MEG studies involving humans have also revealed the significance of the SM1  
358 cortex oscillations for encoding the parameters of voluntary movements, such as  
359 velocity (Jerbi et al., 2007) and acceleration (Bourguignon et al., 2011; 2012). When  
360 studying CKC with motion capture, we evaluated the movement parameters of the  
361 target positions of pixels in each image with videography by using a deep  
362 learning-assisted motion capture system, since the CKC value with motion capture is  
363 not significantly different among approaches using position, velocity, and acceleration  
364 (Supplementary Table).

365 Recently, Bourguignon et al. (2019) reported that using two different approaches  
366 showed interactions between central and peripheral body parts during motor executions;  
367 i.e. CKC and cortico-muscular coherence (CMC) occurs by different mechanisms. CKC,  
368 which is coherent with the movement frequency and its harmonics, is mainly related to  
369 proprioceptive afferent signals. CMC, which mainly occurs at beta frequency bands  
370 during weak muscle contraction, is mainly driven by mu-rhythm-specific neural  
371 modulations in efferent signals. Bourguignon et al. (2019) also reported that the values

372 of CKC during rhythmic finger movements were substantially higher and easier to  
373 detect than those of CMC during isometric finger movements (Brown et al., 1998;  
374 Conway et al., 1995; Farmer et al., 1993; Gross et al., 2000; Halliday et al., 1998;  
375 Kilner et al., 1999, 2004; Mima et al., 1999; Salenius et al., 1997). Because a recording  
376 time of at least 10 min was required for the CMC of the tongue in previous studies  
377 (Maezawa et al., 2014; 2016), the proposed motion capture approach offers the  
378 advantage of a short recording time—approximately 3 min for the CKC of the tongue.  
379 The CKC of the tongue with motion capture also has a technical advantage of enabling  
380 free movement because no objects, such as an ACC, electromyography (EMG)  
381 electrodes, or tracking markers, are placed on the tongue. When objects are placed on  
382 the tongue, they disturb the execution of smooth movement tasks. For example, for the  
383 tongue CMC recording, it is sometimes technically challenging to set the EMG  
384 electrodes on narrow and wet tongue regions because placing electrodes on the tongue  
385 can induce uncomfortable feelings in subjects, resulting in a vomiting reflex. Moreover,  
386 because no objects are used on the tongue in this CKC method, the risk of an object  
387 being swallowed during a tongue movement task is eliminated. In clinical applications  
388 for patients with sensorimotor disorders of the tongue, patients sometimes face  
389 difficulties performing smooth tongue movements and are easily fatigued by movement  
390 tasks. Therefore, the short recording time of the tongue CKC technique provides an  
391 advantage over the conventional CKC and CMC methods that use ACC devices or  
392 EMG electrodes. In a recent clinical setting, Marty et al. (2019) reported that utilization  
393 of the finger CKC is a useful approach for patients with impairment of spinocortical  
394 proprioceptive pathways in Friedreich ataxia. As oropharyngeal dysphagia and/or  
395 speech disorders are also commonly present in individuals with Friedreich ataxia and

396 worsens with disease duration and severity (Keage et al., 2017), the CKC approach of  
397 the tongue might provide electrophysiological evidence for proprioceptive impairment  
398 of corticobulbar proprioceptive pathways.

399       Damage to the cortical areas representing sensorimotor function of the extremities  
400 and language function causes severe dysfunction and seriously decreases the quality of  
401 life. Thus, cortical localization of these functions has received much attention for the  
402 presurgical evaluation of neurosurgical procedures. In contrast, cortical localization of  
403 functions relating to the tongue and other orofacial regions has been relatively  
404 undervalued. This is because the cortical representation of orofacial motor function is  
405 bilateral, and thus damage to the orofacial SM1 does not apparently induce severe  
406 dysfunctions unless the damage is bilateral as well (Cukiert et al., 2001; Lehman et al.,  
407 1994). However, dysfunctions in critical orofacial motor functions may still result from  
408 damage to the orofacial SM1, severely reducing the quality of life. For example,  
409 dysfunctions in critical tongue motor functions can cause dysphagia and silent  
410 aspiration (Meadows, 1973; Horner and Massey, 1988; Robbins et al., 1993). In  
411 addition, damage to the orofacial SM1 may cause a cosmetically conspicuous imbalance  
412 of facial expression between the left and right sides of the face (Lehman et al., 1994).  
413 Because this unbalanced facial expression is easily recognized in daily communication,  
414 the problem should be considered as a target for improvement. Thus, more attention  
415 should be paid to preserving motor functions of the tongue and other orofacial regions  
416 during neurosurgical operations. Here, the CKC technique may be helpful in evaluating  
417 SM1 localization of the orofacial regions in patients with brain lesions observed around  
418 the central sulcus.

419 Previous studies have shown that the finger CKC mainly reflects the proprioceptive  
420 input into the contralateral SM1 (Piitulainen et al., 2013; Bourguignon et al., 2015),  
421 which corresponds to the timing of the strongest deflection of the cortical MEFs  
422 associated with self-paced finger movements (Cheyne et al., 1997). Thus, it is likely that  
423 the cortical mechanisms of the CKC and MEFs are closely related; therefore, it is  
424 reasonable that the tongue CKC was detected over both SM1s without hemispheric  
425 dominance—similar to the MEF results obtained in the bilateral SM1 associated with  
426 self-paced tongue protrusion tasks with intervals of approximately 10 s (Maezawa et al.,  
427 2017).

428 Previous studies have reported that the CMC for the tongue was detected at 2–10 Hz,  
429 which may have been driven by proprioceptive afferents from the tongue muscles to the  
430 cortex—as well as the beta frequency band—during sustained tongue protrusion tasks  
431 (Maezawa et al., 2014; 2016). Because human tongue muscles are rich in muscle  
432 spindles (Cooper, 1953), it is reasonable that the tongue CKC may be related to the  
433 proprioceptive afferents from the tongue muscles associated with rhythmic tongue  
434 movements.

435 Ruspantini et al. (2012) reported that low oscillatory frequency, which is related to  
436 the proprioceptive afferent feedback obtained from the mouth muscles, might be  
437 necessary to generate the fine oral movements required to produce speech. Therefore,  
438 sensory feedback obtained by muscle spindles of the orofacial regions may contribute to  
439 excellent oral motor functions, including swallowing, speech, and mastication. CKC  
440 with motion capture has the advantage of being able to track the motions of multiple  
441 body parts, as the finger CKC for bilateral finger movements can be evaluated  
442 simultaneously. Thus, in the future, CKC with motion capture might be useful for

Maezawa et al.

443 elucidating the cortical mechanisms that enable swallowing and speech through  
444 evaluation of the synchronization of signals between the MEG and movements of  
445 multiple orofacial regions.

446 The occurrence of synchronous head movements corresponding to rhythmic tongue  
447 movements may yield coherent artifacts in the cross-correlogram. This feature  
448 represents a potential limitation of the tongue CKC during repetitive tongue movements,  
449 similar to the limitations related to the finger CKC mentioned in previous studies  
450 (Bourguignon et al., 2011; 2019). In clinical applications of the tongue CKC, the  
451 appearance of artifacts related to head movements must be addressed in patients who  
452 struggle to perform repetitive movements. Another potential limitation is the effect of  
453 touch sensations from the tongue and other orofacial regions, such as the buccal and lip,  
454 during tongue movement tasks. Because CKC appears to be primarily driven by  
455 proprioceptive feedback with no significant evidence of any effect due to cutaneous  
456 input (Piitulainen et al., 2013; 2015), touch sensations might not have been a severe  
457 problem in the present study. Further studies are required to analyze the effects of touch  
458 sensations from orofacial regions on the tongue CKC during tongue movement tasks.  
459 We applied single dipole fitting analysis for the source localization for clinical  
460 application, as dipole fitting is useful for evaluating the somatotopic localization in a  
461 pre-neurosurgical situation. However, it is also useful to reveal the distribution of  
462 cortical activity based on the distributed source modelling from the systematic and  
463 physiological point of view. Further studies are needed to reveal the cortical  
464 mechanisms of tongue movements using distributed source modelling analysis.

465 In conclusion, the use of CKC together with deep learning-assisted motion capture  
466 is a robust and useful approach for evaluating the functional localization of the SM1 of

467 the tongue; it is a magnetic, noise-free, movement-free, and risk-free approach because

468 no recording devices are placed on the tongue.

469

470

471

472 **References**

- 473 Ashe, J., & Georgopoulos, A. P. (1994). Movement parameters and neural activity in  
474 motor cortex and area 5. *Cerebral Cortex*, 4, 590–600.  
475 <https://doi.org/10.1093/cercor/4.6.590>
- 476 Bernstein, N. A. (1967). *The Co-Ordination and Regulation of Movements*, volume 1.  
477 Pergamon Press, Oxford, New York.
- 478 Bourguignon, M., De Tiège, X., Op de Beeck, M., Pirotte, B., Van Bogaert, P., Goldman,  
479 S., Hari, R., & Jousmäki, V. (2011). Functional motor-cortex mapping using  
480 corticokinematic coherence. *NeuroImage*, 55, 1475–1479.  
481 <https://doi.org/10.1016/j.neuroimage.2011.01.031>
- 482 Bourguignon, M., Piitulainen, H., De Tiège, X., Jousmäki, V., & Hari, R. (2015).  
483 Corticokinematic coherence mainly reflects movement-induced proprioceptive  
484 feedback. *NeuroImage*, 106, 382–390.  
485 <https://doi.org/10.1016/j.neuroimage.2014.11.026>
- 486 Bourguignon, M., Jousmäki, V., Op de Beeck, M., Van Bogaert, P., Goldman, S., & De  
487 Tiège, X. (2012). Neuronal network coherent with hand kinematics during fast  
488 repetitive hand movements. *NeuroImage*, 59, 1684–1691.  
489 <https://doi.org/10.1016/j.neuroimage.2011.09.022>
- 490 Bourguignon, M., Jousmäki, V., Marty, B., Wens, V., Op de Beeck, M., Van Bogaert, P.,  
491 Nouali, M., Metens, T., Lubicz, B., Lefranc, F., Bruneau, M., De Witte, O.,  
492 Goldman, S., & De Tiège, X. (2013). Comprehensive functional mapping  
493 scheme for non-invasive primary sensorimotor cortex mapping. *Brain*  
494 *Topography*, 26, 511–523. <https://doi.org/10.1007/s10548-012-0271-9>

- 495 Bourguignon, M., Piitulainen, H., Smeds, E., Zhou, G., Jousmäki, V., & Hari, R. (2017).  
496 MEG insight into the spectral dynamics underlying steady isometric muscle  
497 contraction. *Journal of Neuroscience*, 37, 10421–10437.  
498 <https://doi.org/10.1523/JNEUROSCI.0447-17.2017>
- 499 Bourguignon, M., Jousmäki, V., Dalal, S. S., Jerbi, K., & De Tiège, X. (2019). Coupling  
500 between human brain activity and body movements: Insights from  
501 non-invasive electromagnetic recordings. *NeuroImage*, 203, 116177.  
502 <https://doi.org/10.1016/j.neuroimage.2019.116177>
- 503 Brown, P., Salenius, S., Rothwell, J. C., & Hari, R. (1998). Cortical correlate of the  
504 Piper rhythm in humans. *Journal of Neurophysiology*, 80, 2911–2917.  
505 <https://doi.org/10.1152/jn.1998.80.6.2911>
- 506 Caminiti, R., Johnson, P. B., & Urbano, A. (1990). Making arm movements within  
507 different parts of space: Dynamic aspects in the primate motor cortex. *Journal*  
508 *of Neuroscience*, 10, 2039–2058.  
509 <https://doi.org/10.1523/JNEUROSCI.10-07-02039.1990>
- 510 Carmena, J. M., Lebedev, M. A., Crist, R. E., O’Doherty, J. E., Santucci, D. M.,  
511 Dimitrov, D. F., Patil, P. G., Henriquez, C. S., & Nicolelis, M. A. L. (2003).  
512 Learning to control a brain-machine interface for reaching and grasping by  
513 primates. *PLOS Biology*, 1, E42. <https://doi.org/10.1371/journal.pbio.0000042>
- 514 Cheyne, D., & Weinberg, H. (1989). Neuromagnetic fields accompanying unilateral  
515 finger movements: Pre-movement and movement-evoked fields. *Experimental*  
516 *Brain Research*, 78, 604–612. <https://doi.org/10.1007/BF00230248>
- 517 Cheyne, D., Endo, H., Takeda, T., & Weinberg, H. (1997). Sensory feedback contributes  
518 to early movement-evoked fields during voluntary finger movements in



- 519 humans. *Brain Research*, 771, 196–202.  
520 [https://doi.org/10.1016/S0006-8993\(97\)00765-8](https://doi.org/10.1016/S0006-8993(97)00765-8)
- 521 Conway, B., Halliday, D., Farmer, S.F., Shahani, U., Maas, P., Weir, A. I., & Rosenberg,  
522 J. R. (1995). Synchronization between motor cortex and spinal motoneuronal  
523 pool during the performance of a maintained motor task in man. *Journal of*  
524 *Physiology*, 489, 917–924. <https://doi.org/10.1113/jphysiol.1995.sp021104>
- 525 Cooper, S. (1953). Muscle spindles in the intrinsic muscles of the human tongue.  
526 *Journal of Physiology*, 122 (1), 193-202.  
527 <https://doi.org/10.1113/jphysiol.1953.sp004991>
- 528 Cukiert, A., Buratini, J. A., Machado, E., Sousa, A., Vieira, J., Forster, C., Argenton, M.,  
529 Baldauf, C., & Frayman, L. (2001). Seizure's outcome after cortical resections  
530 including the face and tongue rolandic areas in patients with refractory epilepsy  
531 and normal MRI submitted to subdural grids implantation. *Arquivos de*  
532 *Neuro-Psiquiatria*, 59, 717–721.  
533 <https://doi.org/10.1590/S0004-282X2001000500012>
- 534 Farmer, S. F., Bremner, F. D., Halliday, D. M., Rosenberg, J. R., & Stephens, J. A.  
535 (1993a). The frequency content of common synaptic inputs to motoneurons  
536 studied during voluntary isometric contraction in man. *Journal of Physiology*,  
537 470, 127–155. <https://doi.org/10.1113/jphysiol.1993.sp019851>
- 538 Gerloff, C., Uenishi, N., Nagamine, T., Kunieda, T., Hallett, M., & Shibasaki, H. (1998).  
539 Cortical activation during fast repetitive finger movements in humans:  
540 steady-state movement-related magnetic fields and their cortical generators.  
541 *Electroencephalography and Clinical Neurophysiology*, 109, 444–453.  
542 [https://doi.org/10.1016/S0924-980X\(98\)00045-9](https://doi.org/10.1016/S0924-980X(98)00045-9)

- 543 Gross, J., Tass, P. A., Salenius, S., Hari, R., Freund, H., & Schnitzler, A. (2000).  
544 Cortico-muscular synchronization during isometric muscle contraction in  
545 humans as revealed by magnetoencephalography. *Journal of Physiology*, 527,  
546 623–631. <https://doi.org/10.1111/j.1469-7793.2000.00623.x>
- 547 Halliday, D. M., Conway, B. A., Farmer, S. F., & Rosenberg, J. R. (1998). Using  
548 electroencephalography to study functional coupling between cortical activity  
549 and electromyograms during voluntary contractions in humans. *Neuroscience*  
550 *Letter*, 23, 5–8. [https://doi.org/10.1016/S0304-3940\(97\)00964-6](https://doi.org/10.1016/S0304-3940(97)00964-6)
- 551 Halliday, D. M., Rosenberg, J. R., Amjad, A. M., Breeze, P., Conway, B. A., & Farmer,  
552 S. F. (1995). A framework for the analysis of mixed time series/point process  
553 data- theory and application to the study of physiological tremor, single unit  
554 discharges and electromyogram. *Progress in Biophysics and Molecular Biology*,  
555 64, 237–278. [https://doi.org/10.1016/s0079-6107\(96\)00009-0](https://doi.org/10.1016/s0079-6107(96)00009-0)
- 556 Horner J., & Massey E. W. (1988). Silent aspiration following stroke. *Neurology*, 38(2),  
557 317–319. <https://doi.org/10.1212/WNL.38.2.317>
- 558 Jerbi, K. P., Lachaux, J., N'Diaye, K., Pantazis, D., Leahy, R. M., Garnero, L., & Baillet,  
559 S. (2007). Coherent neural representation of hand speed in humans revealed by  
560 MEG imaging. *Proceedings of the National Academy of Sciences*, 104,  
561 7676–7681. <https://doi.org/10.1073/pnas.0609632104>
- 562 Kilner, J. M., Baker, S. N., Salenius, S., Jousmäki, V., Hari, R., & Lemon, R. N. (1999).  
563 Task-dependent modulation of 15–30 Hz coherence between rectified EMGs  
564 from human hand and forearm muscles. *Journal of Physiology*, 516, 559–570.  
565 <https://doi.org/10.1111/j.1469-7793.1999.0559v.x>

- 566 Lehman, R., Andermann, F., Olivier, A., Tandon, P. N., Quesney, L. F., & Rasmussen, T.  
567 B. (1994). Seizures with onset in the sensorimotor face area: clinical patterns  
568 and results of surgical treatment in 20 patients. *Epilepsia*, 35, 1117–1124.  
569 <https://doi.org/10.1111/j.1528-1157.1994.tb01776.x>
- 570 Maezawa, H. (2017). Cortical mechanisms of tongue sensorimotor functions in humans:  
571 A review of the magnetoencephalography approach.  
572 *Frontiers in Human Neuroscience*, 11, 134. <https://doi.org/10.3389/fnhum.2017.00134>
- 573 Maezawa, H., Mima, T., Yazawa, S., Matsushashi, M., Shiraishi, H., Hirai, Y., &  
574 Funahashi, M. (2014). Contralateral dominance of corticomuscular coherence  
575 for both sides of the tongue during human tongue protrusion: An MEG study.  
576 *NeuroImage*, 101, 245–255. <https://doi.org/10.1016/j.neuroimage.2014.07.018>
- 577 Maezawa, H., Mima, T., Yazawa, S., Matsushashi, M., Shiraishi, H., Hirai, Y., &  
578 Funahashi, M. (2016). Cortico-muscular synchronization by proprioceptive  
579 afferents from the tongue muscles during isometric tongue protrusion.  
580 *NeuroImage*, 128, 284–292. <https://doi.org/10.1016/j.neuroimage.2015.12.058>
- 581 Maezawa, H., Oguma, H., Hirai, Y., Hisadome, K., Shiraishi, H., & Funahashi, M.  
582 (2017). Movement-related cortical magnetic fields associated with self-paced  
583 tongue protrusion in humans. *Neuroscience Research*, 117, 22–27.  
584 <https://doi.org/10.1016/j.neures.2016.11.010>
- 585 Maghsoudi, O. H., Tabrizi, A. V., Robertson, B., & Spence, A. (2017). Superpixels  
586 based marker tracking vs. hue thresholding in rodent biomechanics application.  
587 Preprint at <https://arxiv.org/abs/1710.06473>.  
588 [https://arxiv.org/ct?url=https%3A%2F%2Fdx.doi.org%2F10.1109%2FACSSC.  
589 \[2017.8335168&v=14ff2c94\]\(https://arxiv.org/ct?url=https%3A%2F%2Fdx.doi.org%2F10.1109%2FACSSC.2017.8335168&v=14ff2c94\)](https://arxiv.org/ct?url=https%3A%2F%2Fdx.doi.org%2F10.1109%2FACSSC.2017.8335168&v=14ff2c94)

- 590 Marty, B., Naeije, G., Bourguignon, M., Wens, V., Jousmäki, V., Lynch, D. R., Gaetz,  
591 W., Goldman, S., Hari, R., Pandolfo, M., & De Tiège, X. (2019). Evidence for  
592 genetically determined degeneration of proprioceptive tracts in Friedreich  
593 ataxia. *Neurology*, 93, e116–e124.  
594 <https://doi.org/10.1212/WNL.0000000000007750>
- 595 Mathis, A., Mamidanna, P., Cury, K. M., Abe, T., Murthy, V. N., Mathis, M. W., &  
596 Bethge, M. (2018). DeepLabCut: Markerless pose estimation of user-defined  
597 body parts with deep learning. *Nature Neuroscience*, 21, 1281–1289.  
598 <https://doi.org/10.1038/s41593-018-0209-y>
- 599 Meadows J. C. (1973). Dysphagia in unilateral cerebral lesions. *Journal of Neurology*,  
600 *Neurosurgery, and Psychiatry*, 36(5), 853–860.  
601 <http://dx.doi.org/10.1136/jnnp.36.5.853>
- 602 Mehring, C., Rickert, J., Vaadia, E., Cardoso de Oliveira, S., Aertsen, A., & Rotter, S.  
603 (2003). Inference of hand movements from local field potentials in monkey  
604 motor cortex. *Nature Neuroscience*, 6, 1253–1254.  
605 <https://doi.org/10.1038/nn1158>
- 606 Mima, T., & Hallett, M. (1999). Corticomuscular coherence: A review. *Journal of*  
607 *Clinical Neurophysiology*, 16, 501–511.
- 608 Moran, D. W., & Schwartz, A. B. (1999). Motor cortical representation of speed and  
609 direction during reaching. *Journal of Neurophysiology*, 82, 2676–2692.  
610 <https://doi.org/10.1152/jn.1999.82.5.2676>
- 611 Nath, T., Mathis, A., Chen, A. C., Patel, A., Bethge, M., & Mathis, M. W. (2019). Using  
612 DeepLabCut for 3D markerless pose estimation across species and behaviors.  
613 *Nature Protocols*, 14, 2152–2176. <https://doi.org/10.1038/s41596-019-0176-0>

- 614 Oldfield, R. C. (1971). The assessment and analysis of handedness: The Edinburgh  
615 inventory. *Neuropsychologia*, 9, 97–113.  
616 [https://psycnet.apa.org/doi/10.1016/0028-3932\(71\)90067-4](https://psycnet.apa.org/doi/10.1016/0028-3932(71)90067-4)
- 617 Penfield, W., & Boldrey, E. (1937). Somatic motor and sensory representation in the  
618 cerebral cortex of man as studied by electrical stimulation. *Brain*, 60, 389–443.  
619 <https://doi.org/10.1093/brain/60.4.389>
- 620 Piitulainen, H., Bourguignon, M., De Tiège, X., Hari, R., & Jousmäki, V. (2013a).  
621 Coherence between magnetoencephalography and hand-action-related  
622 acceleration, force, pressure, and electromyogram. *NeuroImage*, 72, 83–90.  
623 <https://doi.org/10.1016/j.neuroimage.2013.01.029>
- 624 Piitulainen, H., Bourguignon, M., De Tiège, X., Hari, R., & Jousmäki, V. (2013).  
625 Corticokinematic coherence during active and passive finger movements.  
626 *Neuroscience*, 238, 361–370.  
627 <https://doi.org/10.1016/j.neuroscience.2013.02.002>
- 628 Piitulainen, H., Bourguignon, M., Hari, R., & Jousmäki, V. (2015). MEG-compatible  
629 pneumatic stimulator to elicit passive finger and toe movements. *NeuroImage*,  
630 112, 310–317. <https://doi.org/10.1016/j.neuroimage.2015.03.006>
- 631 Reina, G. A., Moran, D. W., & Schwartz, A. B. (2001). On the relationship between  
632 joint angular velocity and motor cortical discharge during reaching. *Journal of*  
633 *Neurophysiology*, 85, 2576–2589. <https://doi.org/10.1152/jn.2001.85.6.2576>
- 634 Robbins J., Levine, R. L., Maser, A., Rosenbek, J. C., & Kempster, G. B. (1993).  
635 Swallowing after unilateral stroke of the cerebral cortex. *Archives of Physical*  
636 *Medicine and Rehabilitation*, 74, 1295–1300.  
637 [https://doi.org/10.1016/0003-9993\(93\)90082-L](https://doi.org/10.1016/0003-9993(93)90082-L)

- 638 Rosenberg, J. R., Amjad, A. M., Breeze, P., Brillinger, D. R., & Halliday, D. M. (1989).  
639 The Fourier approach to the identification of functional coupling between  
640 neuronal spike trains. *Progress in Biophysics and Molecular Biology*, 53, 1–31.  
641 [https://doi.org/10.1016/0079-6107\(89\)90004-7](https://doi.org/10.1016/0079-6107(89)90004-7)
- 642 Ruspantini, I., Saarinen, T., Belardinelli, P., Jalava, A., Parviainen, T., Kujala, J., &  
643 Salmelin, R. (2012). Corticomuscular coherence is tuned to the spontaneous  
644 rhythmicity of speech at 2–3 Hz. *Journal of Neuroscience*, 32, 3786–3790.  
645 <https://doi.org/10.1523/JNEUROSCI.3191-11.2012>
- 646 Salenius, S., Portin, K., Kajola, M., Salmelin, R., & Hari, R. (1997). Cortical control of  
647 human motoneuron firing during isometric contraction. *Journal of*  
648 *Neurophysiology*, 77, 3401–3405. <https://doi.org/10.1152/jn.1997.77.6.3401>
- 649 Sarvas, J. (1987). Basic mathematical and electromagnetic concepts of the biomagnetic  
650 inverse problem. *Physics in Medicine and Biology*, 32, 11–22.  
651 <https://doi.org/10.1088/0031-9155/32/1/004>
- 652 Smeds, E., Vanhatalo, S., Piitulainen, H., Bourguignon, M., Jousmäki, V., & Hari, R.  
653 (2017). Corticokinematic coherence as a new marker for somatosensory  
654 afference in newborns. *Clinical Neurophysiology*, 128, 647–655.  
655 <https://doi.org/10.1016/j.clinph.2017.01.006>
- 656 Taulu, S., & Hari, R. (2009). Removal of magnetoencephalographic artifacts with  
657 temporal signal-space separation: Demonstration with single-trial  
658 auditory-evoked responses. *Human Brain Mapping*, 30, 1524–1534.  
659 <https://doi.org/10.1002/hbm.20627>

- 660 Taulu, S., & Simola, J. (2006). Spatiotemporal signal space separation method for  
661 rejecting nearby interference in MEG measurements. *Physics in Medicine and*  
662 *Biology*, 51, 1759–1768. <https://doi.org/10.1088/0031-9155/51/7/008>
- 663 Vargas-Irwin, C. E., Shakhnarovich, G., Yadollahpour, P., Mislow, J. M. K., Black, M. J.,  
664 & Donoghue, J. P. (2010). Decoding complete reach and grasp actions from  
665 local primary motor cortex populations. *Journal of Neuroscience*, 30,  
666 9659–9669. <https://doi.org/10.1523/JNEUROSCI.5443-09.2010>
- 667 Welch, P. (1967). The use of fast Fourier transform for the estimation of power spectra:  
668 A method based on time averaging over short, modified periodograms. *IEEE*  
669 *Transactions on Audio and Electroacoustics*, 15, 70–73.  
670 <https://doi.org/10.1109/TAU.1967.1161901>
- 671 Wenger, N., Moraud, E. M., Raspopovic, S., Bonizzato, M., DiGiovanna, J., Musienko,  
672 P., Morari, M., Micera, S., & Courtine, G. (2014). Closed-loop  
673 neuromodulation of spinal sensorimotor circuits controls refined locomotion  
674 after complete spinal cord injury. *Science Translational Medicine*, 6, 255ra133.  
675 DOI:10.1126/scitranslmed.3008325
- 676 Winter, D. A. (2009). *Biomechanics and Motor Control of Human Movement*. Wiley,  
677 Hoboken, NJ, USA.

678 **Table 1.** Peak frequency and values of CKC of the fingers—right finger conditions

| Sub | Peak frequency (Hz) |                |      |                | CKC value |                |
|-----|---------------------|----------------|------|----------------|-----------|----------------|
|     | Movement signal     |                | CKC  |                | ACC       | Motion capture |
|     | ACC                 | Motion capture | ACC  | Motion capture |           |                |
| 1   | 1.8                 | 1.8            | 3.3  | 3.3            | 0.80      | 0.69           |
| 2   | 3.3                 | 3.3            | 7.0  | 7.0            | 0.60      | 0.61           |
| 3   | 2.0                 | 2.0            | 4.0  | 4.0            | 0.47      | 0.44           |
| 4   | 3.8                 | 3.8            | 3.3  | 3.3            | 0.41      | 0.32           |
| 5   | 2.0                 | 2.0            | 4.0  | 3.5            | 0.44      | 0.55           |
| 6   | 1.8                 | 1.8            | 3.3  | 3.3            | 0.65      | 0.49           |
| 7   | 1.8                 | 1.8            | 3.8  | 3.8            | 0.35      | 0.32           |
| 8   | 2.8                 | 2.8            | 3.0  | 5.5            | 0.33      | 0.34           |
| 9   | 2.0                 | 2.0            | 4.0  | 3.8            | 0.56      | 0.47           |
| 10  | 2.0                 | 2.0            | 2.0  | 2.0            | 0.66      | 0.55           |
| 11  | 2.5                 | 2.5            | 5.0  | 5.3            | 0.55      | 0.26           |
| 12  | 2                   | 2              | 2    | 2              | 0.29      | 0.19           |
| Ave | 2.32                | 2.32           | 3.56 | 3.49           | 0.510     | 0.433          |
| Min | 1.8                 | 1.8            | 2.0  | 2.0            | 0.29      | 0.19           |
| Max | 3.8                 | 3.8            | 7.0  | 7.0            | 0.80      | 0.69           |
| SEM | 0.19                | 0.19           | 0.41 | 0.43           | 0.044     | 0.043          |

679 ACC: accelerometer; Ave: average; CKC: corticokinematic coherence; Max: maximum;  
680 Min: minimum; Movement signal: power spectrum of the movement signal; SEM:  
681 standard error of the mean; Sub: subject number.

682

683

684

685



686 **Table 2.** Peak frequency and values of CKC of the fingers—bilateral finger conditions

687

| Sub | Peak frequency (Hz) |                |     |     |                |     | CKC value |                |      |
|-----|---------------------|----------------|-----|-----|----------------|-----|-----------|----------------|------|
|     | Movement signal     |                |     | CKC |                |     |           |                |      |
|     | ACC                 | Motion capture |     | ACC | Motion capture |     | ACC       | Motion capture |      |
|     | Rt                  | Rt             | Lt  | Rt  | Rt             | Lt  | Rt        | Rt             | Lt   |
| 2   | 3.0                 | 3.0            | 3.0 | 6.0 | 6.0            | 3.3 | 0.48      | 0.22           | 0.22 |
| 3   | 2.3                 | 2.3            | 2.3 | 2.3 | 2.3            | 2.3 | 0.69      | 0.49           | 0.38 |
| 6   | 2.0                 | 2.0            | 2.0 | 2.0 | 2.0            | 4.3 | 0.36      | 0.26           | 0.20 |
| 12  | 2.5                 | 2.5            | 2.5 | 5.0 | 2.5            | 2.8 | 0.36      | 0.24           | 0.22 |

688 ACC: accelerometer; CKC: corticokinematic coherence; Lt: left finger; Movement

689 signal: power spectrum of the movement signal; Rt: right finger; Sub: subject number.

690

691 **Table 3.** Peak frequency and values of CKC of the tongue

692

| Sub | Movement<br>signal | Peak frequency (Hz) |           | CKC value |           |
|-----|--------------------|---------------------|-----------|-----------|-----------|
|     |                    | CKC                 |           | Lt hemis. | Rt hemis. |
|     |                    | Lt hemis.           | Rt hemis. |           |           |
| 1   | 1.8                | 3.3                 | 3.3       | 0.43      | 0.46      |
| 2   | 2.5                | 5.3                 | 5.3       | 0.26      | 0.25      |
| 3   | 2.5                | 3.5                 | 3.3       | 0.34      | 0.16      |
| 4   | 2.8                | 5.0                 | 6.0       | 0.19      | 0.21      |
| 5   | 1.5                | 2.8                 | 3.0       | 0.14      | 0.09      |
| 6   | 2.3                | 4.3                 | 4.3       | 0.17      | 0.10      |
| 7   | 1.5                | 2.8                 | 2.5       | 0.14      | 0.11      |
| 8   | 3.0                | 3.0                 | 2.5       | 0.14      | 0.19      |
| 9   | 1.3                | 2.5                 | 2.5       | 0.18      | 0.29      |
| 10  | 1.5                | 3.0                 | 3.3       | 0.13      | 0.17      |
| 11  | 3.3                | 3.3                 | 3.3       | 0.14      | 0.12      |
| 12  | 1.8                | 4.0                 | 4.0       | 0.18      | 0.11      |
| Ave | 2.15               | 3.57                | 3.61      | 0.203     | 0.188     |
| Min | 1.3                | 2.5                 | 2.5       | 0.13      | 0.09      |
| Max | 3.3                | 5.3                 | 6.0       | 0.43      | 0.46      |
| SEM | 0.19               | 0.26                | 0.32      | 0.027     | 0.031     |

693 Ave: average; CKC: corticokinematic coherence; Lt hemis: left hemisphere; Max:

694 maximum; Min: minimum; Movement signal: power spectrum of the movement signal;

695 Rt hemis: right hemisphere; SEM: standard error of the mean; Sub: subject number.

696 **Figure legends**

697 **Fig. 1.**

698 A. Raw data of movement signals obtained through motion capture and an  
699 accelerometer (ACC), and magnetoencephalographic (MEG) signal from the  
700 contralateral (left) Rolandic sensor for the right finger movement condition of a single  
701 participant (Subject 2). Cyclical rhythms are observed at a specific frequency band of  
702 finger movements using both the motion capture and ACC. B. Power spectra of  
703 movement signals obtained through motion capture and the ACC for the right finger  
704 movement condition of a single participant (Subject 2). The scale of the *x*-axis is 10 Hz.  
705 Note that the peak frequency occurs in the same frequency band of finger movement,  
706 i.e., at 3.3 Hz, in both the motion capture and ACC results (indicated by arrows). C.  
707 Corticokinematic coherence (CKC) waveform from a representative channel over the  
708 contralateral hemisphere for the right finger movement condition of a single participant  
709 (Subject 2) using motion capture and the ACC. The scale of the *x*-axis is 10 Hz. The  
710 horizontal dashed line indicates a significance level of 99%. The CKC peak is observed  
711 at 7.0 Hz in the motion capture (CKC value: 0.61) and ACC (CKC value: 0.60) results  
712 around the harmonic frequency band of the finger movements.

713

714 **Fig. 2.**

715 A. [1, 2] Corticokinematic coherence (CKC) waveform for the tongue from a  
716 representative channel over the left [1] and right [2] hemispheres of a single participant  
717 (subject 1). The scale of the *x*-axis is 10 Hz. The horizontal dashed line indicates a  
718 significance level of 99%. The CKC peak is observed at 3.3 Hz in the left hemisphere  
719 (CKC value: 0.43) and right hemisphere (CKC value: 0.46). [3-5] Spatial distribution of

720 the 1-s-long cross-correlogram for the tongue of a single participant (subject 1). The  
721 largest peaks of the cross-correlogram occurred in the Rolandic sensors of the left [4]  
722 and right [5] hemispheres for the tongue CKC. B. Isocontour maps and dipole locations  
723 for the tongue (B) and finger (C) of Subject 1. The time points that showed the  
724 cross-correlation peaks were used to obtain the contour map. The incoming and  
725 outgoing magnetic fluxes are denoted by the blue and red lines, respectively (B[1],  
726 C[1]). The green arrows denote the directions and locations of the equivalent current  
727 dipoles (ECDs), which were projected onto the surface of the skull. The arrowheads  
728 indicate the negative poles of the ECDs. The ECDs (blue dots) of the tongue (B[2]) and  
729 finger (C[2]) are superimposed on magnetic resonance image slices of the participant.  
730 The directions of the blue lines represent the negative poles of the ECDs. Both ECDs  
731 are located at the central sulcus (B[2], C[2]). The locations of the ECDs of the tongue  
732 are estimated to be more lateral, anterior, and inferior to those of the finger. Lt: Left  
733 side.

734

735 **Fig. 3.**

736 Average locations of the ECDs of the tongue and finger CKCs on the  $x$ -,  $y$ -, and  $z$ -axes,  
737 considering all participants. The data points represent the means  $\pm$  SEM values. The  
738 locations of the ECDs of the tongue are considerably lateral and inferior to those of the  
739 finger. The  $x$ -axis intersects the preauricular points from left to right; the  $y$ -axis passes  
740 through the nasion; the  $z$ -axis is perpendicular to the plane determined by the  $x$ - and  
741  $y$ -axes. Asterisks indicate statistically significant differences ( $p < 0.0167$ ).

742

743 **Supplementary Video 1.**

744 Sample video of pose estimation of the tongue during the tongue movement task. The  
745 solid blue circles were identified using the learning program with DeepLabCut. The  
746 movie is slowed to a quarter of the real-time speed.

747

748 **Supplementary Video 2.**

749 Movement task of the fingers in the bilateral finger condition. The solid blue (right  
750 finger) and red (left finger) circles were identified using the learning program with  
751 DeepLabCut. The movie is slowed to a quarter of the real-time speed.

**A.****Motion capture signal**

bioRxiv preprint doi: <https://doi.org/10.1101/2021.08.18.456754>; this version posted August 19, 2021. The copyright holder for this preprint (which was not certified by peer review) is the author/funder, who has granted bioRxiv a license to display the preprint in perpetuity. It is made available under a [CC-BY-NC-ND 4.0 International license](#).

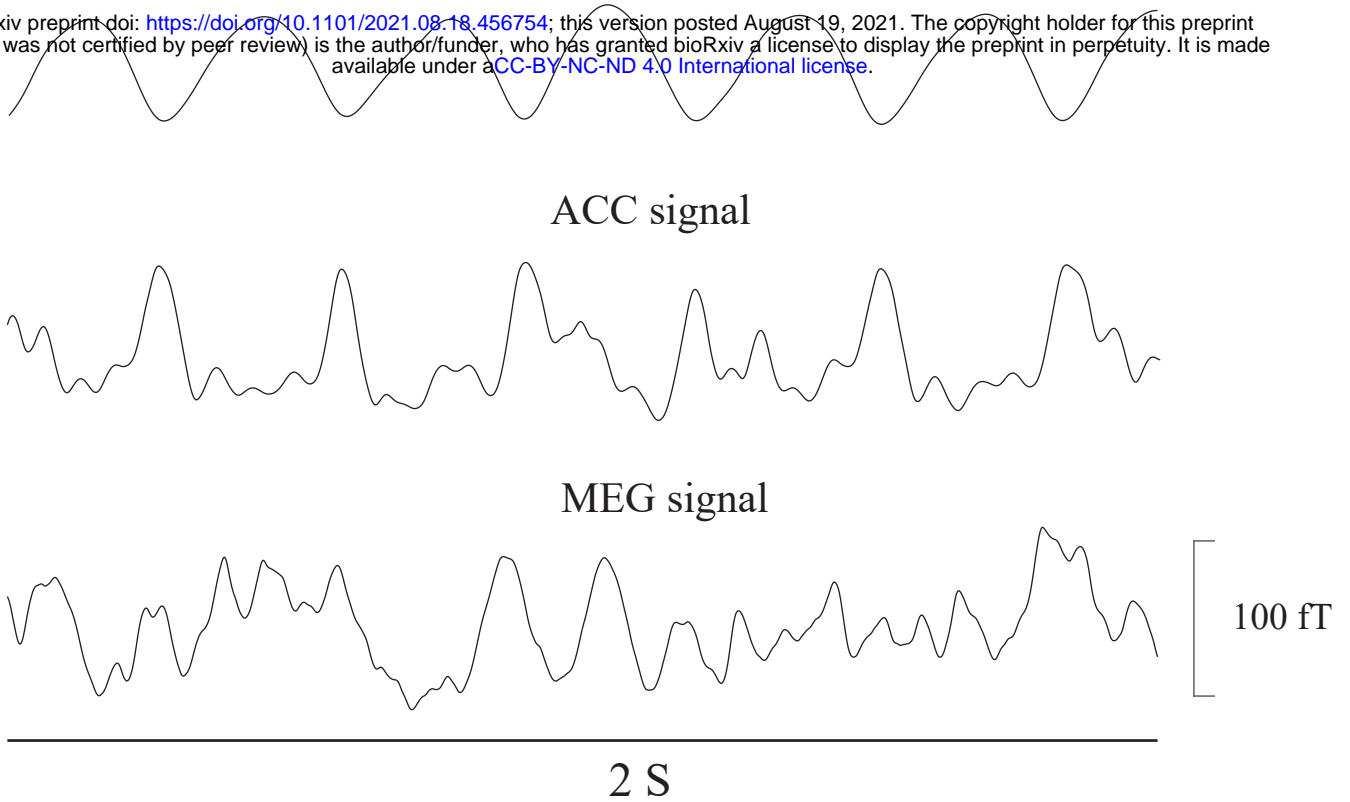**B.**

Motion capture

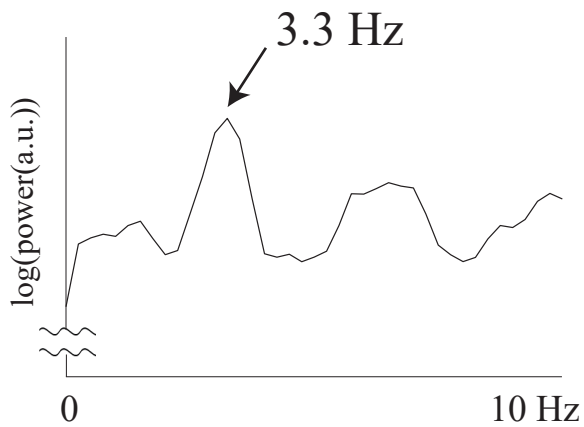

ACC

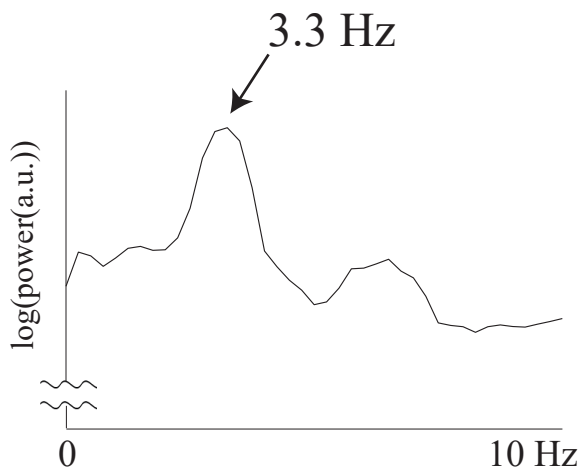**C.**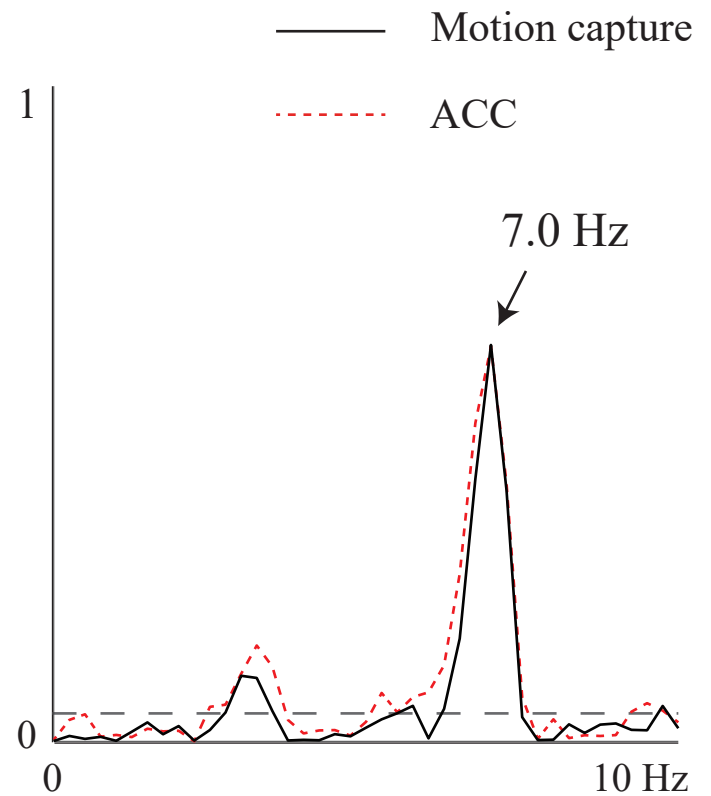

## A. Coherence and cross-correlogram for the tongue

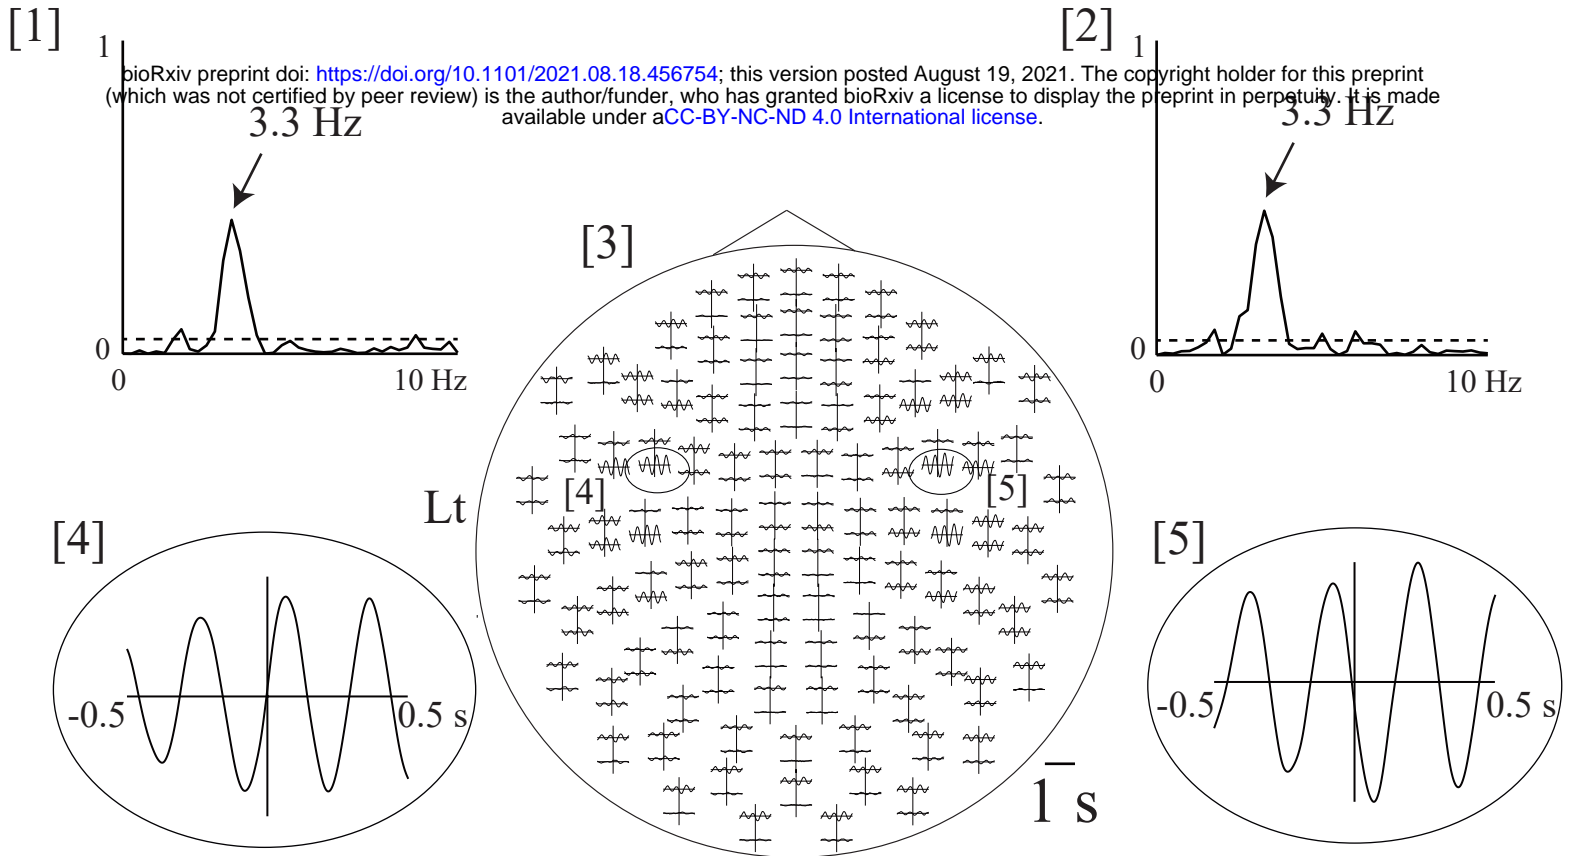

## B. Isocontour map [1] and dipole location [2] for the tongue

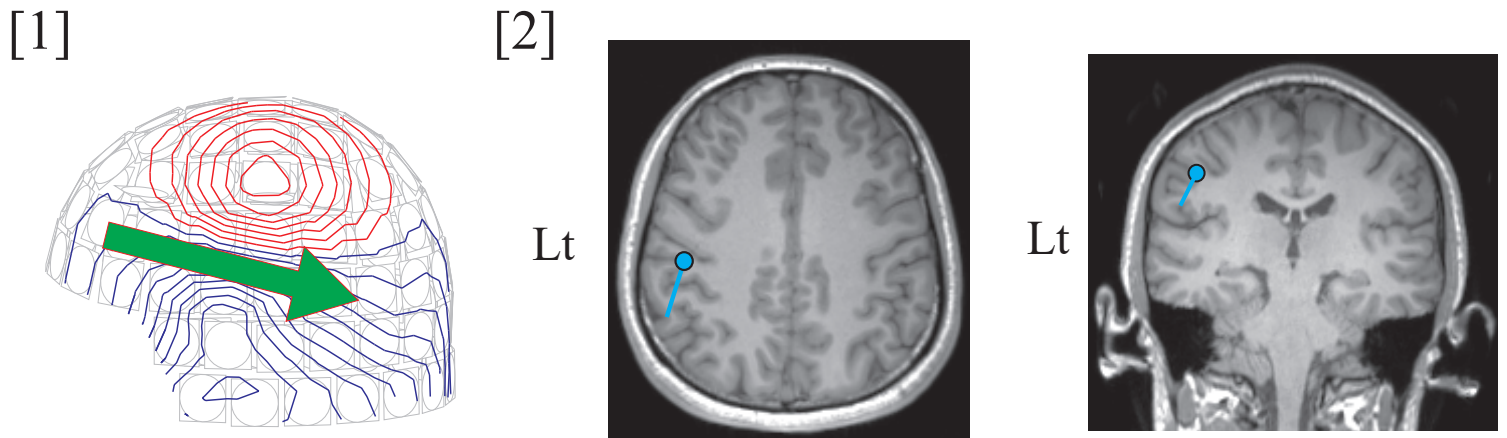

## C. Isocontour map [1] and dipole location [2] for the finger

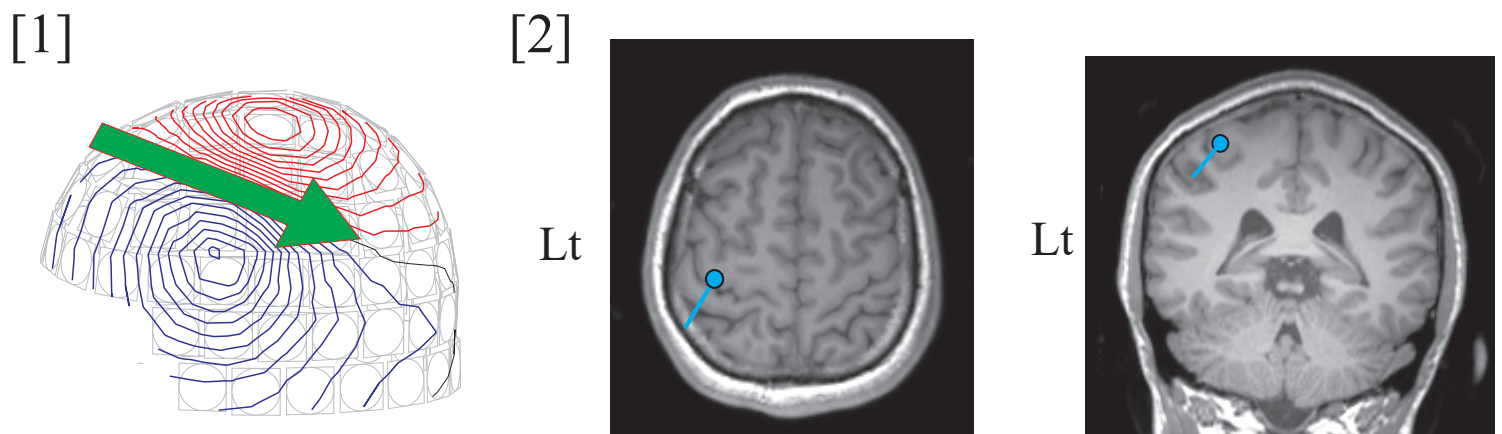

*x*-axis

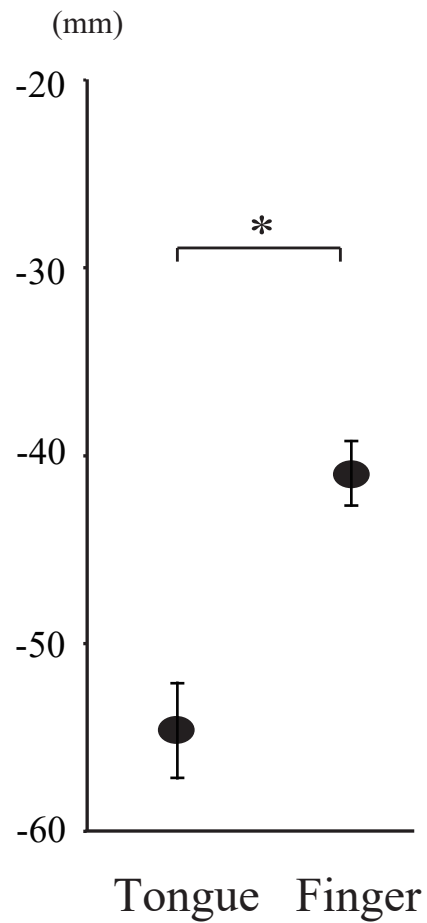

*y*-axis

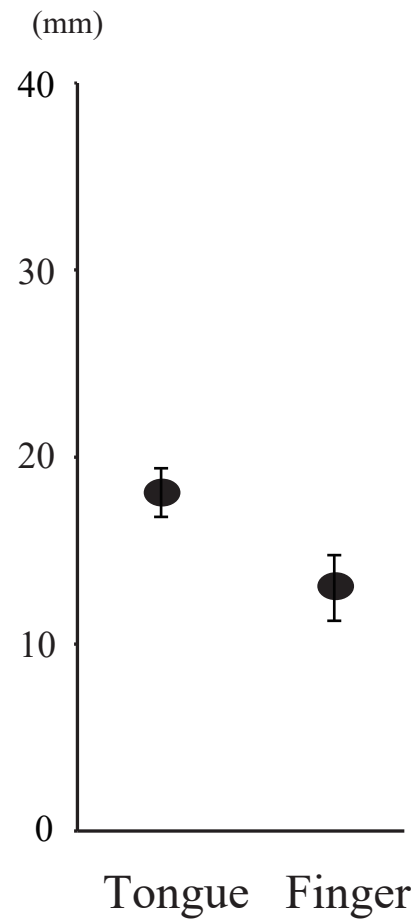

*z*-axis

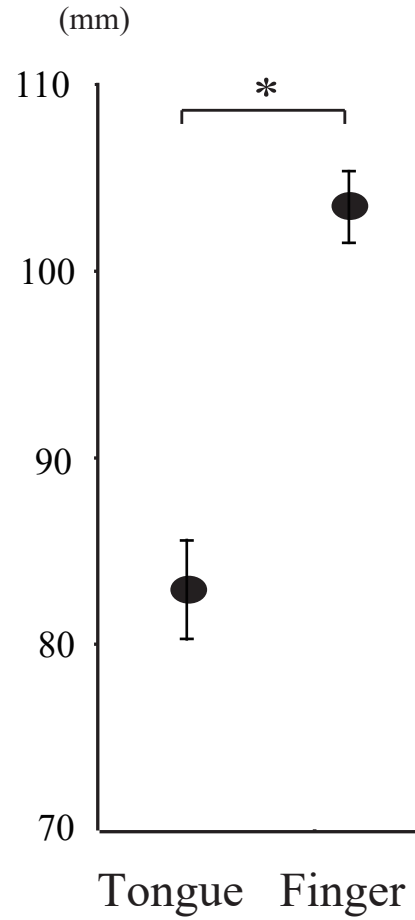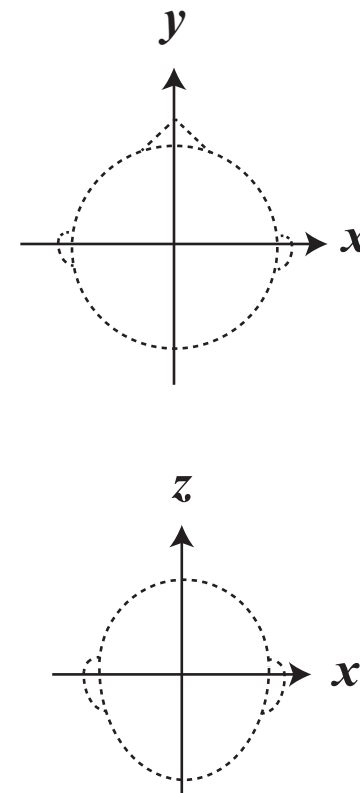

Source: https://biorxiv.org/content/10.1101/2021.08.18.456754v1.full.pdf
